# Gene expression analysis reveals the dysregulation of immune and metabolic pathways in Alzheimer's disease

Juan Chen<sup>1,\*</sup>, Chuncheng Xie<sup>2,\*</sup>, Yanhong Zhao<sup>3,\*</sup>, Zhiyan Li<sup>1</sup>, Panpan Xu<sup>1</sup> and Lifen Yao<sup>1</sup>

<sup>1</sup> Department of Neurology, The First Affiliated Hospital, Harbin Medical University, Harbin, China

<sup>2</sup> Department of Neurosurgery, The First Affiliated Hospital, Harbin Medical University, Harbin, China

<sup>3</sup> Department of Internal Hematology, The First Affiliated Hospital, Harbin Medical University, Harbin, China

\* These authors have contributed equally to this work

Correspondence to: Lifen Yao, email: lifenyaolf@sina.com

Keywords: Alzheimer's disease; pathway analysis; expression data; Pathology Section

Received: June 29, 2016

Accepted: September 28, 2016

Published: October 06, 2016

## ABSTRACT

**In recent years, several pathway analyses of genome-wide association studies reported the involvement of metabolic and immune pathways in Alzheimer's disease (AD). Until now, the exact mechanisms of these pathways in AD are still unclear. Here, we conducted a pathway analysis of a whole genome AD case-control expression dataset ( $n=41$ , 25 AD cases and 16 controls) from the human temporal cortex tissue. Using the differently expressed AD genes, we identified significant KEGG pathways related to metabolism and immune processes. Using the up- and down-regulated AD gene list, we further found up-regulated AD gene were significantly enriched in immune and metabolic pathways. We further compare the immune and metabolic KEGG pathways from the expression dataset with those from previous GWAS datasets, and found that most of these pathways are shared in both GWAS and expression datasets.**

## INTRODUCTION

To investigate Alzheimer's disease (AD) genetic risk factors, several genome-wide association studies (GWAS) have identified several new AD susceptibility loci in European populations, and some of these loci were successfully replicated in other studies [1-5]. To detect more AD genetic signals, several pathway analyses of GWAS datasets have been conducted [6-11]. Lambert et al. identified significant immune KEGG pathways and GO categories in AD [6]. Jones et al. reported significant KEGG pathways and 25 GO pathways in AD [8]. Most of the 25 pathways are related to metabolism [8]. Liu et al. highlighted the cardiovascular disease-related pathways in AD [12]. The International Genomics of Alzheimer's Project (IGAP) Consortium reported 10 significant KEGG pathways [13]. Until now, the potential mechanisms of these risk pathways in AD are still unclear.

We think that the different expression (up-regulation or down-regulation) of genes in these pathways may contribute to AD susceptibility. Here, we selected a whole genome AD case-control expression dataset ( $n = 41$ , 25

AD cases and 16 controls) from the human temporal cortex tissue, and conducted a pathway analysis using all the differently expressed AD genes, up-regulated AD genes, and down-regulated AD genes. We further compare the AD risk pathways from the expression dataset with those from previous GWAS datasets to address the potential mechanisms.

## RESULTS

### Pathway analysis of differently expressed AD genes

Using 1179 differently expressed AD genes, we identified 33 significant immune and metabolic pathways with  $P < 0.05$  after FDR correction for multiple testing. These 33 pathways include 11 immune pathways and 22 metabolic pathways (Table 1). Oxidative phosphorylation (hsa00190) and Systemic lupus erythematosus (hsa05322) are the most significant metabolic and immune pathways with adjusted  $P = 1.33E-07$  and  $P = 4.00E-04$ , respectively.

**Table 1: significant pathways from the pathway analysis of differently expressed AD genes in expression dataset**

| Classification | Pathway ID | Pathway Name                                               | C   | O  | E    | R     | rawP     | adjP     |
|----------------|------------|------------------------------------------------------------|-----|----|------|-------|----------|----------|
| Immunity       | hsa05322   | Systemic lupus erythematosus                               | 136 | 13 | 3.72 | 3.5   | 9.70E-05 | 4.00E-04 |
| Immunity       | hsa05323   | Rheumatoid arthritis                                       | 91  | 7  | 2.49 | 2.81  | 1.25E-02 | 1.70E-02 |
| Immunity       | hsa04666   | Fc gamma R-mediated phagocytosis                           | 94  | 9  | 2.57 | 3.5   | 1.10E-03 | 2.90E-03 |
| Immunity       | hsa04062   | Chemokine signaling pathway                                | 189 | 13 | 5.17 | 2.52  | 2.20E-03 | 4.80E-03 |
| Immunity       | hsa04640   | Hematopoietic cell lineage                                 | 88  | 8  | 2.41 | 3.33  | 2.80E-03 | 5.50E-03 |
| Immunity       | hsa04650   | Natural killer cell mediated cytotoxicity                  | 136 | 10 | 3.72 | 2.69  | 4.30E-03 | 7.30E-03 |
| Immunity       | hsa04670   | Leukocyte transendothelial migration                       | 116 | 9  | 3.17 | 2.84  | 4.70E-03 | 7.80E-03 |
| Immunity       | hsa04660   | T cell receptor signaling pathway                          | 108 | 8  | 2.95 | 2.71  | 9.70E-03 | 1.41E-02 |
| Immunity       | hsa04622   | RIG-I-like receptor signaling pathway                      | 71  | 6  | 1.94 | 3.09  | 1.31E-02 | 1.75E-02 |
| Immunity       | hsa04662   | B cell receptor signaling pathway                          | 75  | 6  | 2.05 | 2.93  | 1.68E-02 | 2.22E-02 |
| Immunity       | hsa04612   | Antigen processing and presentation                        | 76  | 6  | 2.08 | 2.89  | 1.78E-02 | 2.29E-02 |
| Metabolism     | hsa00190   | Oxidative phosphorylation                                  | 132 | 17 | 3.61 | 4.71  | 1.33E-07 | 2.19E-06 |
| Metabolism     | hsa00360   | Phenylalanine metabolism                                   | 17  | 7  | 0.46 | 15.06 | 1.72E-07 | 2.43E-06 |
| Metabolism     | hsa00020   | Citrate cycle (TCA cycle)                                  | 30  | 7  | 0.82 | 8.54  | 1.32E-05 | 9.48E-05 |
| Metabolism     | hsa00250   | Alanine, aspartate and glutamate metabolism                | 32  | 7  | 0.87 | 8     | 2.07E-05 | 1.00E-04 |
| Metabolism     | hsa00830   | Retinol metabolism                                         | 64  | 9  | 1.75 | 5.14  | 5.91E-05 | 3.00E-04 |
| Metabolism     | hsa00500   | Starch and sucrose metabolism                              | 54  | 8  | 1.48 | 5.42  | 1.00E-04 | 4.00E-04 |
| Metabolism     | hsa00350   | Tyrosine metabolism                                        | 41  | 7  | 1.12 | 6.25  | 1.00E-04 | 4.00E-04 |
| Metabolism     | hsa00270   | Cysteine and methionine metabolism                         | 36  | 6  | 0.98 | 6.1   | 4.00E-04 | 1.30E-03 |
| Metabolism     | hsa00983   | Drug metabolism - other enzymes                            | 52  | 7  | 1.42 | 4.92  | 5.00E-04 | 1.50E-03 |
| Metabolism     | hsa00053   | Ascorbate and aldarate metabolism                          | 26  | 5  | 0.71 | 7.03  | 6.00E-04 | 1.70E-03 |
| Metabolism     | hsa00980   | Metabolism of xenobiotics by cytochrome P450               | 71  | 8  | 1.94 | 4.12  | 7.00E-04 | 2.00E-03 |
| Metabolism     | hsa00982   | Drug metabolism - cytochrome P450                          | 73  | 8  | 2    | 4.01  | 9.00E-04 | 2.50E-03 |
| Metabolism     | hsa00040   | Pentose and glucuronate interconversions                   | 32  | 5  | 0.87 | 5.72  | 1.70E-03 | 3.90E-03 |
| Metabolism     | hsa00140   | Steroid hormone biosynthesis                               | 56  | 6  | 1.53 | 3.92  | 4.20E-03 | 7.30E-03 |
| Metabolism     | hsa00620   | Pyruvate metabolism                                        | 40  | 5  | 1.09 | 4.57  | 4.50E-03 | 7.60E-03 |
| Metabolism     | hsa00380   | Tryptophan metabolism                                      | 42  | 5  | 1.15 | 4.35  | 5.60E-03 | 8.90E-03 |
| Metabolism     | hsa00860   | Porphyrin and chlorophyll metabolism                       | 43  | 5  | 1.18 | 4.25  | 6.20E-03 | 9.60E-03 |
| Metabolism     | hsa00514   | Other types of O-glycan biosynthesis                       | 46  | 5  | 1.26 | 3.98  | 8.20E-03 | 1.23E-02 |
| Metabolism     | hsa00561   | Glycerolipid metabolism                                    | 50  | 5  | 1.37 | 3.66  | 1.16E-02 | 1.59E-02 |
| Metabolism     | hsa00562   | Inositol phosphate metabolism                              | 57  | 5  | 1.56 | 3.21  | 1.96E-02 | 2.49E-02 |
| Metabolism     | hsa00010   | Glycolysis / Gluconeogenesis                               | 65  | 5  | 1.78 | 2.81  | 3.25E-02 | 3.83E-02 |
| Metabolism     | hsa00534   | Glycosaminoglycan biosynthesis - heparan sulfate / heparin | 26  | 5  | 0.71 | 7.03  | 6.00E-04 | 1.70E-03 |

C, the number of reference genes in the category; O, the number of genes in the gene set and also in the category; E, expected number in the category; R, the ratio of enrichment, rawP, the *p* value from hypergeometric test; adjP, the *p* value adjusted by the multiple test adjustment.

### Pathway analysis of up-regulated AD genes

Using 599 up-regulated AD genes, we identified 18 significant pathways including 6 immune and 12 metabolic pathways with  $P < 0.05$  after FDR correction for multiple testing (Table 2). Systemic lupus erythematosus (hsa05322) and Phenylalanine metabolism (hsa00360) are the most significant immune and metabolic pathways with adjusted  $P = 1.44E-06$  and  $P = 3.08E-05$ , respectively.

### Pathway analysis of down-regulated AD genes

Using 580 down-regulated AD genes, we identified 6 significant signals including 1 immune and 5 metabolic pathways with  $P < 0.05$  after FDR correction for multiple testing (Table 3). Chemokine signaling pathway (hsa04062) is the only significant immune pathway with adjusted  $P = 1.90E-03$ . Interestingly, Oxidative phosphorylation (hsa00190), the most significant signal from the pathway analysis of all differently expressed AD genes (Table 1), is also the most significant metabolic

**Table 2: significant pathways from the pathway analysis of up-regulated AD genes in expression dataset**

| Classification | Pathway ID | Pathway Name                                 | C   | O  | E    | R     | rawP     | adjP     |
|----------------|------------|----------------------------------------------|-----|----|------|-------|----------|----------|
| Immunity       | hsa05322   | Systemic lupus erythematosus                 | 136 | 13 | 1.89 | 6.88  | 6.41E-08 | 1.44E-06 |
| Immunity       | hsa04670   | Leukocyte transendothelial migration         | 116 | 8  | 1.61 | 4.97  | 2.00E-04 | 7.00E-04 |
| Immunity       | hsa04640   | Hematopoietic cell lineage                   | 88  | 6  | 1.22 | 4.91  | 1.40E-03 | 2.40E-03 |
| Immunity       | hsa04650   | Natural killer cell mediated cytotoxicity    | 136 | 7  | 1.89 | 3.71  | 3.00E-03 | 4.10E-03 |
| Immunity       | hsa04666   | Fc gamma R-mediated phagocytosis             | 94  | 5  | 1.31 | 3.83  | 1.01E-02 | 1.23E-02 |
| Immunity       | hsa04660   | T cell receptor signaling pathway            | 108 | 5  | 1.5  | 3.33  | 1.76E-02 | 2.03E-02 |
| Metabolism     | hsa00360   | Phenylalanine metabolism                     | 17  | 5  | 0.24 | 21.18 | 2.74E-06 | 3.08E-05 |
| Metabolism     | hsa00500   | Starch and sucrose metabolism                | 54  | 7  | 0.75 | 9.33  | 9.69E-06 | 7.27E-05 |
| Metabolism     | hsa00053   | Ascorbate and aldarate metabolism            | 26  | 5  | 0.36 | 13.85 | 2.63E-05 | 1.00E-04 |
| Metabolism     | hsa00830   | Retinol metabolism                           | 64  | 7  | 0.89 | 7.87  | 3.01E-05 | 2.00E-04 |
| Metabolism     | hsa00040   | Pentose and glucuronate interconversions     | 32  | 5  | 0.44 | 11.25 | 7.51E-05 | 3.00E-04 |
| Metabolism     | hsa00860   | Porphyryn and chlorophyll metabolism         | 43  | 5  | 0.6  | 8.37  | 3.00E-04 | 9.00E-04 |
| Metabolism     | hsa00350   | Tyrosine metabolism                          | 41  | 5  | 0.57 | 8.78  | 3.00E-04 | 9.00E-04 |
| Metabolism     | hsa00514   | Other types of O-glycan biosynthesis         | 46  | 5  | 0.64 | 7.83  | 4.00E-04 | 1.00E-03 |
| Metabolism     | hsa00982   | Drug metabolism - cytochrome P450            | 73  | 6  | 1.01 | 5.92  | 5.00E-04 | 1.10E-03 |
| Metabolism     | hsa00980   | Metabolism of xenobiotics by cytochrome P450 | 71  | 6  | 0.99 | 6.08  | 5.00E-04 | 1.10E-03 |
| Metabolism     | hsa00983   | Drug metabolism - other enzymes              | 52  | 5  | 0.72 | 6.92  | 8.00E-04 | 1.60E-03 |
| Metabolism     | hsa00140   | Steroid hormone biosynthesis                 | 56  | 5  | 0.78 | 6.43  | 1.10E-03 | 2.10E-03 |

C, O, E, R, rawP, and adjP have been defined in Table 1.

**Table 3: significant pathways from the pathway analysis of down-regulated AD genes in expression dataset**

| Classification | Pathway ID | Pathway Name                                               | C   | O  | E    | R     | rawP     | adjP     |
|----------------|------------|------------------------------------------------------------|-----|----|------|-------|----------|----------|
| Immunity       | hsa04062   | Chemokine signaling pathway                                | 189 | 9  | 2.54 | 3.54  | 1.10E-03 | 1.90E-03 |
| Metabolism     | hsa00190   | Oxidative phosphorylation                                  | 132 | 17 | 1.78 | 9.58  | 3.15E-12 | 2.91E-11 |
| Metabolism     | hsa00020   | Citrate cycle (TCA cycle)                                  | 30  | 7  | 0.4  | 17.35 | 1.19E-07 | 7.47E-07 |
| Metabolism     | hsa00250   | Alanine, aspartate and glutamate metabolism                | 32  | 6  | 0.43 | 13.94 | 3.88E-06 | 1.62E-05 |
| Metabolism     | hsa00534   | Glycosaminoglycan biosynthesis - heparan sulfate / heparin | 26  | 5  | 0.35 | 14.3  | 2.25E-05 | 7.70E-05 |
| Metabolism     | hsa00230   | Purine metabolism                                          | 162 | 7  | 2.18 | 3.21  | 6.60E-03 | 8.20E-05 |

C, O, E, R, rawP, and adjP have been defined in Table 1.

pathway from pathway analysis of down-regulated AD genes with adjusted  $P = 2.99E-11$  (Table 3).

### Comparing the AD immune pathways using GWAS and expression data

We compared the 11 AD immune pathways with previous pathway analysis of AD GWAS. We found that 9 of the 11 pathways in Table 1 (excluding Leukocyte transendothelial migration, hsa04670 and B cell receptor signaling pathway, hsa04662) have been identified by Liu [12]. 4 of these 11 AD immune pathways including Natural killer cell mediated cytotoxicity (hsa04650), Antigen processing and presentation (hsa04622), RIG-I-like receptor signaling (hsa04612), and Hematopoietic cell lineage (hsa04640), have been reported [6, 8, 13].

### Comparing the AD metabolic pathways using GWAS and expression data

We compared the 22 AD metabolic pathways with previous pathway analysis of AD GWAS. We found that 10 of the 22 pathways in Table 1 have been identified [12], including Oxidative phosphorylation (hsa00190), Steroid hormone biosynthesis (hsa00140), Metabolism of xenobiotics by cytochrome P450 (hsa00980), Porphyryn and chlorophyll metabolism (hsa00860), Drug metabolism - cytochrome P450 (hsa00982), Pentose and glucuronate interconversions (hsa00040), Pyruvate metabolism (hsa00620), Retinol metabolism (hsa00830), Glycolysis / Gluconeogenesis (hsa00010), and Starch and sucrose metabolism (hsa00500).

## DISCUSSION

Recent studies reported the involvement of immune and metabolic KEGG pathways and GO categories in AD in European population [6, 8]. Evidence shows that the human genes may be differentially expressed in different ethnic populations [14]. Here, we investigated the potential mechanisms of these pathways in AD by a pathway analysis of a genome-wide expression dataset in European population [15]. In this pathway analysis, we analyzed all the differentially expressed genes, up-regulated genes and down-regulated genes [16]. It is reported that the analyzing the up-regulated genes and down-regulated genes is more powerful than analyzing all differentially expressed genes [16]. Using the differently expressed AD genes, we identified significantly enriched KEGG pathways related to metabolism and immune processes. Using the up-regulated and down-regulated AD gene list, we further found up-regulated AD genes were significantly enriched in immune and metabolic pathways. We further compare the immune and metabolic KEGG pathways from the expression dataset with those from previous GWAS datasets, and found that most of these pathways are shared in both GWAS and expression datasets.

Interestingly, the clinical studies supported the involvement of immune and metabolic processes in AD, such as disrupted energy metabolism [17-20], and dysregulation of iron metabolism [21], lipid metabolism [22], phosphoinositides and phosphatidic acid in AD [22], cerebellar glucose metabolism [23], hippocampal metabolism [24], and cerebral metabolism [25]. Take the Natural killer cell mediated cytotoxicity (hsa04650) for example. It is shared in the GWAS and expression datasets. Natural killer cells play an important role in host defence, and are involved in AD immunopathogenesis [26]. The increased natural killer cell cytotoxicity in AD may involve protein kinase C dysregulation [27]. Take the Oxidative phosphorylation (hsa00190) for example. Oxidative phosphorylation could influence clinical status and neuroimaging intermediates in AD [28], and involve early mitochondrial dysfunction and oxidative damage in AD [29]. In summary, our results show that the different expression of genes in immune and metabolic pathways may be associated with AD susceptibility. Our findings may offer new avenues for developing therapeutics for AD by regulating the expression of genes in these immune and metabolic pathways.

Meanwhile, some limitations exist in our research. Here, we performed the pathway analysis of AD expression data using the KEGG database and did not selected the GO categories, considering the difference between KEGG and GO databases [6, 8]. Here, we selected only 41 samples from the human temporal cortex tissue. In future, we will select more large-scale sample size and more brain regions to evaluate our findings,

and further compare these findings with those from GO database.

## MATERIALS AND METHODS

### AD expression dataset

The expression dataset came from a whole genome AD case-control expression study ( $n = 41$ , 25 cases and 16 controls) using human temporal cortex tissue [15]. 25 AD cases and 16 controls were well-matched for age and postmortem delay [15]. We got 1196 significantly differently expressed Affymetrix transcripts with  $P < 0.05$  after false discovery rate (FDR) correction [15].

### Dataset preprocessing

In this expression dataset, the 1196 significantly differently expressed transcripts correspond to 1361 unique genes. 1179 of 1361 genes were successfully mapped to 1179 unique Entrez Gene IDs in WebGestalt database [30]. Other 182 genes were mapped to multiple Entrez Gene IDs or could not be mapped to any Entrez Gene ID. The following pathway analysis of all the differently expressed genes will be based upon the 1179 unique genes.

The total of 1196 significantly differently expressed transcripts include 603 significantly up-regulated (AD cases *vs.* controls) and 593 significantly down-regulated (AD cases *vs.* controls) transcripts, which correspond to 710 and 654 unique genes (3 transcripts are both up- and down-regulated in AD cases and controls). 599 of 710 up-regulated genes were successfully mapped to 599 unique Entrez Gene IDs in WebGestalt database [30]. Other 111 genes were mapped to multiple Entrez Gene IDs or could not be mapped to any Entrez Gene ID. The following pathway analysis of up-regulated genes will be based upon the 599 unique genes. 580 of 654 up-regulated genes were successfully mapped to 580 unique Entrez Gene IDs in WebGestalt database [30]. Other 74 genes were mapped to multiple Entrez Gene IDs or could not be mapped to any Entrez Gene ID. The following pathway analysis of down-regulated genes will be based upon the 580 unique genes.

### Pathway-based test

We selected the WebGestalt database for pathway analysis, and the hypergeometric test was used to identify the significant KEGG pathways [30]. We first conducted a pathway analysis using all the differently expressed AD genes, significantly up-regulated (AD cases *vs.* controls) and down-regulated genes (AD cases *vs.* controls). We

selected KEGG pathways including 10-300 genes for subsequent pathway analysis [31]. The entire Entrez gene set was defined to be the reference gene list [30]. We limited potential KEGG pathways with least AD risk 5 genes and with FDR adjusted *p*-value below 0.05 [30].

## ACKNOWLEDGMENTS

We thank Tan et al. for the expression dataset. This work was supported by funding from the National Nature Science Foundation of China (ID: 81471326).

## CONFLICTS OF INTERESTS

The authors declare no competing financial interests.

## Author Contributions

J.C., C.C.X., H.Y.Z., and L.F.Y. conceived and initiated the project. J.C., C.C.X., H.Y.Z. analyzed the data. Z.Y.L. and P.P.X. prepared the Tables. J.C., C.C.X., H.Y.Z., Z.Y.L., P.P.X. and L.F.Y. wrote the manuscript. All authors reviewed the manuscript, and contributed to the final manuscript.

## REFERENCES

1. Harold D, Abraham R, Hollingworth P, Sims R, Gerrish A, Hamshere ML, Pahwa JS, Moskva V, Dowzell K, Williams A, Jones N, Thomas C, Stretton A, et al. Genome-wide association study identifies variants at *CLU* and *PICALM* associated with Alzheimer's disease. *Nat Genet.* 2009; 41: 1088-93.
2. Lambert JC, Heath S, Even G, Campion D, Sleegers K, Hiltunen M, Combarros O, Zelenika D, Bullido MJ, Tavernier B, Letenneur L, Bettens K, Berr C, et al. Genome-wide association study identifies variants at *CLU* and *CR1* associated with Alzheimer's disease. *Nat Genet.* 2009; 41: 1094-9.
3. Seshadri S, Fitzpatrick AL, Ikram MA, DeStefano AL, Gudnason V, Boada M, Bis JC, Smith AV, Carassquillo MM, Lambert JC, Harold D, Schrijvers EM, Ramirez-Lorca R, et al. Genome-wide analysis of genetic loci associated with Alzheimer disease. *JAMA.* 2010; 303: 1832-40.
4. Hollingworth P, Harold D, Sims R, Gerrish A, Lambert JC, Carrasquillo MM, Abraham R, Hamshere ML, Pahwa JS, Moskva V, Dowzell K, Jones N, Stretton A, et al. Common variants at *ABCA7*, *MS4A6A/MS4A4E*, *EPHA1*, *CD33* and *CD2AP* are associated with Alzheimer's disease. *Nat Genet.* 2011; 43: 429-35.
5. Naj AC, Jun G, Beecham GW, Wang LS, Vardarajan BN, Buross J, Gallins PJ, Buxbaum JD, Jarvik GP, Crane PK, Larson EB, Bird TD, Boeve BF, et al. Common variants at *MS4A4/MS4A6E*, *CD2AP*, *CD33* and *EPHA1* are associated with late-onset Alzheimer's disease. *Nat Genet.* 2011; 43: 436-41.
6. Lambert JC, Grenier-Boley B, Chouraki V, Heath S, Zelenika D, Fievet N, Hannequin D, Pasquier F, Hanon O, Brice A, Epelbaum J, Berr C, Dartigues JF, et al. Implication of the immune system in Alzheimer's disease: evidence from genome-wide pathway analysis. *J Alzheimers Dis.* 2010; 20: 1107-18.
7. Hong MG, Alexeyenko A, Lambert JC, Amouyel P, Prince JA. Genome-wide pathway analysis implicates intracellular transmembrane protein transport in Alzheimer disease. *J Hum Genet.* 2010; 55: 707-9.
8. Jones L, Holmans PA, Hamshere ML, Harold D, Moskva V, Ivanov D, Pocklington A, Abraham R, Hollingworth P, Sims R, Gerrish A, Pahwa JS, Jones N, et al. Genetic evidence implicates the immune system and cholesterol metabolism in the aetiology of Alzheimer's disease. *PLoS One.* 2010; 5: e13950.
9. Liu G, Jiang Y, Wang P, Feng R, Jiang N, Chen X, Song H, Chen Z. Cell adhesion molecules contribute to Alzheimer's disease: multiple pathway analyses of two genome-wide association studies. *J Neurochem.* 2012; 120: 190-8.
10. Jiang Q, Jin S, Jiang Y, Liao M, Feng R, Zhang L, Liu G, Hao J. Alzheimer's Disease Variants with the Genome-Wide Significance are Significantly Enriched in Immune Pathways and Active in Immune Cells. *Mol Neurobiol.* 2016.
11. Bao X, Liu G, Jiang Y, Jiang Q, Liao M, Feng R, Zhang L, Ma G, Zhang S, Chen Z, Zhao B, Wang R, Li K. Cell adhesion molecule pathway genes are regulated by cis-regulatory SNPs and show significantly altered expression in Alzheimer's disease brains. *Neurobiol Aging.* 2015; 36: 2904 e1-7.
12. Liu G, Yao L, Liu J, Jiang Y, Ma G, Chen Z, Zhao B, Li K. Cardiovascular disease contributes to Alzheimer's disease: evidence from large-scale genome-wide association studies. *Neurobiol Aging.* 2014; 35: 786-92.
13. Convergent genetic and expression data implicate immunity in Alzheimer's disease. *Alzheimers Dement.* 2015; 11: 658-71.
14. Lu J, Clark AG. Impact of microRNA regulation on variation in human gene expression. *Genome Res.* 2012; 22: 1243-54.
15. Tan MG, Chua WT, Esiri MM, Smith AD, Vinters HV, Lai MK. Genome wide profiling of altered gene expression in the neocortex of Alzheimer's disease. *J Neurosci Res.* 2010; 88: 1157-69.
16. Hong G, Zhang W, Li H, Shen X, Guo Z. Separate enrichment analysis of pathways for up- and downregulated genes. *J R Soc Interface.* 2014; 11: 20130950.
17. Ferreira IL, Resende R, Ferreira E, Rego AC, Pereira CF. Multiple defects in energy metabolism in Alzheimer's disease. *Curr Drug Targets.* 2010; 11: 1193-206.
18. Maher PA, Schubert DR. Metabolic links between diabetes

- and Alzheimer's disease. *Expert Rev Neurother.* 2009; 9: 617-30.
19. Liang WS, Reiman EM, Valla J, Dunckley T, Beach TG, Grover A, Niedzielko TL, Schneider LE, Mastroeni D, Caselli R, Kukull W, Morris JC, Hulette CM, et al. Alzheimer's disease is associated with reduced expression of energy metabolism genes in posterior cingulate neurons. *Proc Natl Acad Sci U S A.* 2008; 105: 4441-6.
  20. Sun J, Feng X, Liang D, Duan Y, Lei H. Down-regulation of energy metabolism in Alzheimer's disease is a protective response of neurons to the microenvironment. *J Alzheimers Dis.* 2012; 28: 389-402.
  21. Oshiro S, Morioka MS, Kikuchi M. Dysregulation of iron metabolism in Alzheimer's disease, Parkinson's disease, and amyotrophic lateral sclerosis. *Adv Pharmacol Sci.* 2011; 2011: 378278.
  22. Di Paolo G, Kim TW. Linking lipids to Alzheimer's disease: cholesterol and beyond. *Nature Reviews Neuroscience.* 2011; 12: 284-96.
  23. Ishii K, Sasaki M, Kitagaki H, Yamaji S, Sakamoto S, Matsuda K, Mori E. Reduction of cerebellar glucose metabolism in advanced Alzheimer's disease. *J Nucl Med.* 1997; 38: 925-8.
  24. Mosconi L, Tsui WH, De Santi S, Li J, Rusinek H, Convit A, Li Y, Boppana M, de Leon MJ. Reduced hippocampal metabolism in MCI and AD: automated FDG-PET image analysis. *Neurology.* 2005; 64: 1860-7.
  25. Burns CM, Chen K, Kaszniak AW, Lee W, Alexander GE, Bandy D, Fleisher AS, Caselli RJ, Reiman EM. Higher serum glucose levels are associated with cerebral hypometabolism in Alzheimer regions. *Neurology.* 2013; 80: 1557-64.
  26. Jadidi-Niaragh F, Shegarfi H, Naddafi F, Mirshafiey A. The role of natural killer cells in Alzheimer's disease. *Scand J Immunol.* 2012; 76: 451-6.
  27. Solerte SB, Fioravanti M, Pascale A, Ferrari E, Govoni S, Battaini F. Increased natural killer cell cytotoxicity in Alzheimer's disease may involve protein kinase C dysregulation. *Neurobiol Aging.* 1998; 19: 191-9.
  28. Biffi A, Sabuncu MR, Desikan RS, Schmansky N, Salat DH, Rosand J, Anderson CD. Genetic variation of oxidative phosphorylation genes in stroke and Alzheimer's disease. *Neurobiol Aging.* 2014; 35: 1956 e1-8.
  29. Manczak M, Park BS, Jung Y, Reddy PH. Differential expression of oxidative phosphorylation genes in patients with Alzheimer's disease: implications for early mitochondrial dysfunction and oxidative damage. *Neuromolecular Med.* 2004; 5: 147-62.
  30. Zhang B, Kirov S, Snoddy J. WebGestalt: an integrated system for exploring gene sets in various biological contexts. *Nucleic Acids Res.* 2005; 33: W741-8.
  31. Quan B, Qi X, Yu Z, Jiang Y, Liao M, Wang G, Feng R, Zhang L, Chen Z, Jiang Q, Liu G. Pathway analysis of genome-wide association study and transcriptome data highlights new biological pathways in colorectal cancer. *Mol Genet Genomics.* 2015; 290: 603-10.
