# Supplementary material for: Gene expression analysis reveals the dysregulation of immune and metabolic pathways in Alzheimer's disease
Source: PubMed Central journal article supplement (PMC5341922; doi:10.18632/oncotarget.12505), 2016-10-06
Supplement: oncotarget-07-72469-s001.pdf [file oncotarget-07-72469-s001.pdf]

# Gene expression analysis reveals the dysregulation of immune and metabolic pathways in Alzheimer's disease

## Supplementary Material

Supplementary Table 1, Gene IDs in pathway analysis of all differently expressed AD genes in expression dataset

| Classifications | Pathway Name                                 | Pathway ID | Entrez ID                                                                                                      |
|-----------------|----------------------------------------------|------------|----------------------------------------------------------------------------------------------------------------|
| Immune diseases | Systemic lupus erythematosus                 | hsa05322   | 8968 8352 733 8341 8351 8350 8358 8353 8355 8357 8369 8356 8354                                                |
| Immune diseases | Rheumatoid arthritis                         | hsa05323   | 1514 7040 529 1435 284 534 9550                                                                                |
| Immune system   | Fc gamma R-mediated phagocytosis             | hsa04666   | 5581 2934 5335 4651 8976 3984 5580 7410 8394 5829 8976 5580 7410 5590 2185 2932 409 23236 5566 5970 56288      |
| Immune system   | Chemokine signaling pathway                  | hsa04062   | 5567                                                                                                           |
| Immune system   | Hematopoietic cell lineage                   | hsa04640   | 3554 4254 960 909 1435 7037 914 945                                                                            |
| Immune system   | Natural killer cell mediated cytotoxicity    | hsa04650   | 5535 3824 5335 4068 7410 5534 2185 5533 8797 3107                                                              |
| Immune system   | Leukocyte transendothelial migration         | hsa04670   | 2185 5335 5829 1365 9080 399 83700 7410 49861                                                                  |
| Immune system   | T cell receptor signaling pathway            | hsa04660   | 5535 5335 7410 868 5534 2932 5533 5970                                                                         |
| Immune system   | RIG-I-like receptor signaling pathway        | hsa04622   | 3661 9474 5970 5300 7186 8717                                                                                  |
| Immune system   | B cell receptor signaling pathway            | hsa04662   | 5535 2932 5533 5970 7410 5534                                                                                  |
| Immune system   | Antigen processing and presentation          | hsa04612   | 1514 3824 5993 3107 5641 4802 4704 4719 7384 506 4701 6389 509 534 27068 7385 4722 4715 498 529 4702 4720 9550 |
| Metabolism      | Oxidative phosphorylation                    | hsa00190   | 529 4702 4720 9550                                                                                             |
| Metabolism      | Phenylalanine metabolism                     | hsa00360   | 259307 6898 2805 2806 314 1644 218                                                                             |
| Metabolism      | Citrate cycle (TCA cycle)                    | hsa00020   | 5160 4190 1738 6389 55753 47 1737                                                                              |
| Metabolism      | Alanine, aspartate and glutamate metabolism  | hsa00250   | 259307 2572 2805 56954 2571 2806 27165                                                                         |
| Metabolism      | Retinol metabolism                           | hsa00830   | 56603 10720 54490 157506 53630 79799 7364 51109 7365                                                           |
| Metabolism      | Starch and sucrose metabolism                | hsa00500   | 8972 79799 178 10720 7364 54490 7365 6476                                                                      |
| Metabolism      | Tyrosine metabolism                          | hsa00350   | 259307 6898 2805 2806 314 1644 218                                                                             |
| Metabolism      | Cysteine and methionine metabolism           | hsa00270   | 259307 6898 27430 2805 2806 4357                                                                               |
| Metabolism      | Drug metabolism - other enzymes              | hsa00983   | 8833 3251 79799 10720 7364 54490 7365                                                                          |
| Metabolism      | Ascorbate and aldarate metabolism            | hsa00053   | 79799 10720 7364 54490 7365                                                                                    |
| Metabolism      | Metabolism of xenobiotics by cytochrome P450 | hsa00980   | 10720 54490 218 79799 2941 9446 7364 7365                                                                      |
| Metabolism      | Drug metabolism - cytochrome P450            | hsa00982   | 10720 54490 218 79799 2941 9446 7364 7365                                                                      |
| Metabolism      | Pentose and glucuronate interconversions     | hsa00040   | 79799 10720 7364 54490 7365                                                                                    |
| Metabolism      | Steroid hormone biosynthesis                 | hsa00140   | 79799 412 10720 7364 54490 7365                                                                                |
| Metabolism      | Pyruvate metabolism                          | hsa00620   | 5160 4190 32 1738 1737                                                                                         |
| Metabolism      | Tryptophan metabolism                        | hsa00380   | 259307 56267 1644 55753 15                                                                                     |

|            |                                                            |          |                             |
|------------|------------------------------------------------------------|----------|-----------------------------|
| Metabolism | Porphyrin and chlorophyll metabolism                       | hsa00860 | 79799 10720 7364 54490 7365 |
| Metabolism | Other types of O-glycan biosynthesis                       | hsa00514 | 79799 10720 7364 54490 7365 |
| Metabolism | Glycerolipid metabolism                                    | hsa00561 | 160851 4023 55750 1608 9162 |
| Metabolism | Inositol phosphate metabolism                              | hsa00562 | 3707 5335 8394 23236 51196  |
| Metabolism | Glycolysis / Gluconeogenesis                               | hsa00010 | 5160 1738 5213 218 1737     |
| Metabolism | Glycosaminoglycan biosynthesis - heparan sulfate / heparin | hsa00534 | 90161 9348 2132 2135 26035  |

---

Supplementary Table 2, Gene IDs in pathway analysis of up-regulated AD genes in expression dataset

| Classifications | Pathway Name                                 | Pathway ID | Entrez ID                                                       |
|-----------------|----------------------------------------------|------------|-----------------------------------------------------------------|
| Immune diseases | Systemic lupus erythematosus                 | hsa05322   | 733 8968 8352 8341 8351 8358 8350 8353 8355 8357 8369 8356 8354 |
| Immune system   | Leukocyte transendothelial migration         | hsa04670   | 5335 5829 9080 7410 49861 1365 399 83700                        |
| Immune system   | Hematopoietic cell lineage                   | hsa04640   | 3554 960 909 1435 914 945                                       |
| Immune system   | Natural killer cell mediated cytotoxicity    | hsa04650   | 5535 3824 5335 8797 3107 4068 7410                              |
| Immune system   | Fc gamma R-mediated phagocytosis             | hsa04666   | 2934 5335 8394 4651 7410                                        |
| Immune system   | T cell receptor signaling pathway            | hsa04660   | 5535 5335 5970 7410 868                                         |
| Metabolism      | Phenylalanine metabolism                     | hsa00360   | 259307 6898 314 1644 218                                        |
| Metabolism      | Starch and sucrose metabolism                | hsa00500   | 8972 79799 7364 10720 54490 7365 6476                           |
| Metabolism      | Ascorbate and aldarate metabolism            | hsa00053   | 79799 7364 10720 54490 7365                                     |
| Metabolism      | Retinol metabolism                           | hsa00830   | 53630 79799 7364 10720 54490 157506 7365                        |
| Metabolism      | Pentose and glucuronate interconversions     | hsa00040   | 79799 7364 10720 54490 7365                                     |
| Metabolism      | Porphyrin and chlorophyll metabolism         | hsa00860   | 79799 7364 10720 54490 7365                                     |
| Metabolism      | Tyrosine metabolism                          | hsa00350   | 259307 6898 314 1644 218                                        |
| Metabolism      | Other types of O-glycan biosynthesis         | hsa00514   | 79799 7364 10720 54490 7365                                     |
| Metabolism      | Drug metabolism - cytochrome P450            | hsa00982   | 79799 7364 10720 54490 218 7365                                 |
| Metabolism      | Metabolism of xenobiotics by cytochrome P450 | hsa00980   | 79799 7364 10720 54490 218 7365                                 |
| Metabolism      | Drug metabolism - other enzymes              | hsa00983   | 79799 7364 10720 54490 7365                                     |
| Metabolism      | Steroid hormone biosynthesis                 | hsa00140   | 79799 7364 10720 54490 7365                                     |

Supplementary Table 3, Gene IDs in pathway analysis of down-regulated AD genes in expression dataset

| Classifications | Pathway Name                                               | Pathway ID | Entrez ID                                                                                                 |
|-----------------|------------------------------------------------------------|------------|-----------------------------------------------------------------------------------------------------------|
| Immune system   | Chemokine signaling pathway                                | hsa04062   | 8976 5580 5590 2185 2932 409 23236 5566 5567<br>4704 4719 7384 506 4701 6389 534 509 7385 27068 4722 4715 |
| Metabolism      | Oxidative phosphorylation                                  | hsa00190   | 498 4702 529 4720 9550                                                                                    |
| Metabolism      | Citrate cycle (TCA cycle)                                  | hsa00020   | 5160 4190 1738 6389 55753 47 1737                                                                         |
| Metabolism      | Alanine, aspartate and glutamate metabolism                | hsa00250   | 2572 2805 56954 27165 2571 2806                                                                           |
| Metabolism      | Glycosaminoglycan biosynthesis - heparan sulfate / heparin | hsa00534   | 90161 9348 2132 2135 26035                                                                                |
| Metabolism      | Purine metabolism                                          | hsa00230   | 8833 51292 3251 27115 8382 1633 10621                                                                     |
